# Supplementary material for: Multimodal profiling of chordoma immunity reveals distinct immune contextures
Source: PubMed Central journal article supplement — J Immunother Cancer. 2024 Jan 25;12(1):e008138. doi: 10.1136/jitc-2023-008138 (PMC10824073; doi:10.1136/jitc-2023-008138), 2024-01-25
Supplement: jitc-2023-008138supp001.pdf [file jitc-2023-008138supp001.pdf]

**Index of supplemental information****Supplemental methods**

**Supplemental table 1.** Imaging mass cytometry marker panel

**Supplemental table 2.** Cell type lineage markers imaging mass cytometry

**Supplemental table 3** legend (table added separately)

**Supplemental table 4** legend (table added separately)

**Supplemental table 5.** Univariate cox proportional hazard results in the combined cohort.

**Supplemental table 6.** Univariate and multivariate cox proportional hazard results in the combined cohort

**Supplemental references**

**Supplemental figure 1** | Chordomas are enriched for immune-related gene signaling

**Supplemental figure 2** | Overview of the chordoma microenvironment

**Supplemental figure 3** | ICR high chordomas are enriched with T cell phenotypes

**Supplemental figure 4** | The immune contexture of chordomas varies over time

**Supplemental figure 5** | Comparative overview of the chordoma immune microenvironment

**Supplemental figure 6** | CD4+ T cell infiltration and HLA class I expression in association with CD8+ T cell infiltration

**Supplemental figure 7** |  $\gamma\delta$  T cell infiltration in relation to HLA class I expression

## Supplemental methods

### Patient samples

These TMAs were holding 2-4 cores of 1.6 mm in diameter per tumour, dependent on the source of the material or the morphology of the tumour (two cores: biopsy; three cores: resection/excision etc; four cores: heterogeneous morphology, or separate areas of dedifferentiation). As controls and for orientation purposes, each TMA contained three cores tonsil and three cores placenta, either decalcified with EDTA or formic acid or non-decalcified.

### Gene expression analysis

Normalisation and exploratory analysis of the RNA sequencing data was performed in R (v.4.0.2) by using DESeq2 (v. 1.30.1). BiomaRt (R, v.2.46.3) was used to translate the ensemble IDs to known protein coding genes. The most variably expressed genes were determined by calculating the variance per gene across all samples. The immunologic constant of rejection (ICR) gene signature was used to describe the activity state immune microenvironment and to identify distinct immune-related clusters (Th1-related markers: *IFNG*, *STAT1*, *IL12B*, *IRF1*, *TBX21*; CD8+ T cells: *CD8A*, *CD8B*; Immune effector molecules: *GZMA*, *GZMB*, *GZMH*, *PRF1*, *GNLY*; Chemokine ligands: *CXCL9*, *CXCL10*, *CCL5*; Immune suppressive molecules: *IDO1*, *PDCD1*, *CD274*, *CTLA4*, *FOXP3*) (1). The mean of the log<sub>2</sub> normalised expression of these 20 genes was used to attribute an ICR “score” to each sample for comparison between the sarcoma subtypes, which was visualised with ggplot2 (R, v.3.3.6). For both the heatmaps in **figure 1**, a Z-Score was calculated per gene to visualise the transcriptional profile of the samples by using the Ward variance method with ComplexHeatmap (R, v.2.11.1). Differential gene expression analysis was performed with DESeq2 comparing chordomas to all other sarcomas. Genes were considered differentially expressed when the log<sub>2</sub> fold change was above 2 and the adjusted *P* value was below 0.01. Immune-related genes were selected for visualisation in the enhanced volcano plot and additional boxplots. For visualisation purposes, the axes of the enhanced volcano plot were manually adjusted as follows: log<sub>2</sub> fold change (x-axis) was set between -10 and 10, and the -log<sub>10</sub> adjusted *P* (y-axis) was set to a maximum of 100.

### Imaging mass cytometry analysis

To correct for variability in signal-to-noise ratios between FFPE sections, the signal intensity of the generated images was normalised at pixel levels by using Matlab (v.R2021a), after which the images were binarised using semi-automated background removal in Ilastik (v.1.3.3) as described previously (2). Probability masks were generated in Ilastik by using a multicoloured image including the DNA channel, CD45 channel, Keratin channel and Vimentin channel to annotate nucleus, cytoplasm and

background. Probability masks were loaded into CellProfiler (v.2.2.0) and used for creating cell segmentation masks. Next, the segmentation masks and binarised images were loaded into ImaCyte (3) to generate single cell-FCS files containing relative frequency of positive pixels for each marker, which were then used for phenotyping in CytoSplore (v.2.3.1) by sequentially utilizing Hierarchical Stochastic Neighbour Embedding (H-SNE) and t-distributed Stochastic Neighbour Embedding (t-SNE). Identified cell phenotypes were loaded into ImaCyte together with the segmentation masks and binarised images, which allows the mapping of the phenotypes back onto the images. Phenotypes per image were extracted to calculate the mean cell density per mm<sup>2</sup> for every sample (one image = one mm<sup>2</sup>). An overview of the lineage markers used for phenotype identification is listed in **supplemental table 2**. Patients were clustered into two groups based on the Z-Score normalised mean cell densities per mm<sup>2</sup> of all five identified T cell phenotypes by using the Ward variance method with ComplexHeatmap. Ggplot2 was used to visualise the mean cell densities and to compare them between both T cell groups. For statistical testing, a two-sided student's t-test was performed followed by a Benjamini-Hochberg FDR correction. In addition, an overview heatmap containing all identified phenotypes in the microenvironment of chordomas was visualised with ComplexHeatmap.

#### **Spatial interaction analysis**

After phenotype calling, a spatial interaction analysis was performed with ImaCyte for all imaged samples, comparing T cell low with T cell high chordomas. ImaCyte utilises a 1000-iteration permutation test which calculates a Z-Score for the interaction between adjacent cells. However, permutation testing does not adjust for overabundant cell types, such as tumour cells, and is therefore not able to identify meaningful interactions for tumour cells. Because of the range of the calculated Z-Scores, interactions with a Z-Score below 10 were considered not significant and therefore removed for visualisation only. If an interaction Z-Score was higher than 10 in one group and lower than 10 in the other group, this interaction was considered significant for one group. When both Z-Scores were higher than 10, this interaction would be considered significant in both groups. A comparative interaction heatmap between all phenotypes excluding tumour cells was visualised with ggplot2.

#### **Multispectral immunofluorescent imaging of T cells**

All TMAs were imaged at 20x, after which the images were processed with inForm (v.2.4), which comprises background removal for each antibody by normalisation of the spectra, and analysed with QuPath (v.0.3.1). Object classification was performed by using the following classes: CD3<sup>+</sup>FOXP3<sup>+</sup> = Regulatory T cells, CD3<sup>+</sup>CD8<sup>+</sup> = CD8<sup>+</sup> T cells, CD3<sup>+</sup> = CD4<sup>+</sup> T cells, CD3<sup>+</sup>Ki-67<sup>+</sup> = Proliferating T cells, CD3<sup>-</sup> = Rest. Counts per image (one image = 1 mm x 1.3 mm) were normalised per patient to counts per

mm<sup>2</sup> tissue. Patients were divided into a T cell high and low cluster based on the unsupervised clustering of the Z-scores of all T cell phenotypes.

### **Survival analysis**

For all chordoma patients, Kaplan-Meier curves for the disease-specific survival and recurrence-free survival were generated with the *survminer* and *survival* packages (R, v.0.4.9 and v.3.1-12 respectively). The disease-specific survival was considered the survival of a patient until death due to the disease, whereas the recurrence-free survival was considered the time until a patient was diagnosed with a recurrence, thereby excluding patients who did not receive surgery. Since the cohort included many censored cases, the log-rank *P* value was used to estimate the significance of the associations. Known prognostic factors such as the anatomical tumour location excluding the only extra-axial patient, age and type of treatment, surgical margin excluding patients who did not receive surgery and disease recurrence were investigated for their prognostic value, as well as the newly identified T cell infiltration groups. Univariate and multivariate analyses were performed in R according to the cox proportional hazard model. Only clinical parameters that were found significant in the univariate analysis were taken along in the multivariate analysis.

### **TCR $\beta$ -chain sequencing**

The number of clones and the Shannon diversity, a measure for clonal enrichment, were calculated in R by using productive counts only, meaning that a clone needed at least 10 plus and 10 minus counts. Because recurrences showed similar levels of TCR diversity as their respective primary tumour, we used the TCR repertoire of recurrences for three patients for which there was no frozen material of primary tumours available. Finally, the data was visualised in R using *ggplot2*.



**Supplemental table 1. Imaging mass cytometry marker panel.** Ab = antibody, ON = overnight, PDPN = podoplanin.

|            | Target                         | Clone           | Metal  | Incubation Time | Temp | Dilution (x) |
|------------|--------------------------------|-----------------|--------|-----------------|------|--------------|
| Lymphoid   | CD103                          | EPR4166(2)      | 168 Er | 5h              | RT   | 50           |
|            | CD20                           | H1              | 142 Nd | Overnight       | 4C   | 100          |
|            | CD3                            | EP449E          | 153 Eu | Overnight       | 4C   | 50           |
|            | CD38                           | EPR4106         | 169 Tm | Overnight       | 4C   | 100          |
|            | CD4 + 2nd AB                   | EPR6855         | 145 Nd | Indirect ON     | 4C   | 100          |
|            | CD7                            | EPR4242         | 174 Yb | 5h              | RT   | 100          |
|            | CD8a                           | D8A8Y           | 146 Nd | 5h              | RT   | 50           |
|            | FOXP3                          | D608R           | 159 Tb | Overnight       | 4C   | 50           |
|            | TCR $\gamma$ $\delta$ + 2nd Ab | H41             | 148 Nd | Indirect ON     | 4C   | 50           |
| Myeloid    | CD11b                          | D6X1N           | 144 Nd | 5h              | RT   | 100          |
|            | CD11c                          | EP1347Y         | 176 Yb | 5h              | RT   | 100          |
|            | CD14                           | D7A2T           | 163 Dy | 5h              | RT   | 100          |
|            | CD15                           | MC480           | 171 Yb | Overnight       | 4C   | 100          |
|            | CD163                          | D6U1J           | 173 Yb | 5h              | RT   | 50           |
|            | CD204                          | J5HTR3          | 164 Dy | 5h              | RT   | 50           |
|            | CD68                           | D4B9C           | 143 Nd | Overnight       | 4C   | 100          |
|            | HLA-DR                         | TAL 1B5         | 141 Pr | 5h              | RT   | 100          |
| Stroma     | CD31                           | 89C2            | 147 Sm | Overnight       | 4C   | 100          |
|            | CD39                           | EPR20627        | 157 Gd | 5h              | RT   | 100          |
|            | CD45                           | D9M8I           | 149 Sm | Overnight       | 4C   | 50           |
|            | CD45RO                         | UCHL1           | 165 Ho | Overnight       | 4C   | 100          |
|            | D2-40 (PDPN)                   | D2-40           | 166 Er | Overnight       | 4C   | 100          |
|            | TGF- $\beta$                   | TB21            | 115 In | 5h              | RT   | 100          |
|            | Vimentin                       | D21H3           | 194 Pt | Overnight       | 4C   | 50           |
| Activation | Cleaved Caspase                | 5A1E            | 172 Yb | 5h              | RT   | 100          |
|            | Granzyme B                     | D6E9W           | 150 Nd | 5h              | RT   | 100          |
|            | ICOS                           | D1K2T(TM)       | 161 Dy | 5h              | RT   | 50           |
|            | IDO                            | D5J4E(TM)       | 162 Dy | Overnight       | 4C   | 100          |
|            | Ki-67                          | 8D5             | 152 Sm | Overnight       | 4C   | 100          |
|            | LAG-3                          | D2G40(TM)       | 155 Gd | 5h              | RT   | 50           |
|            | PD-1                           | D4W2J           | 160 Gd | 5h              | RT   | 50           |
|            | PD-L1                          | E1L3N(R)        | 156 Gd | Overnight       | 4C   | 50           |
|            | Tbet                           | 4B10            | 170 Er | 5h              | RT   | 50           |
|            | TIM-3                          | D5D5R(TM)       | 154 Sm | 5h              | RT   | 100          |
|            | VISTA                          | D1L2G(TM)       | 158 Gd | 5h              | RT   | 100          |
| Tumour     | CD56                           | E7X9M           | 167 Er | 5h              | RT   | 100          |
|            | CD57                           | HNK-1 / Leu-7   | 151 Eu | Overnight       | 4C   | 100          |
|            | Keratin                        | C11 and AE1/AE3 | 198 Pt | Overnight       | 4C   | 50           |
|            | P16ink4a                       | D3W8G           | 175 Lu | Overnight       | 4C   | 100          |
|            | $\beta$ -Catenin               | D10A8           | 89 Y   | Overnight       | 4C   | 100          |
| DNA        | Histone H3                     | D1H2            | 209 Bi | Overnight       | 4C   | 50           |

**Supplemental table 2. Cell type lineage markers imaging mass cytometry.** Colours are indicating cell types according to overview heatmap in **supplemental figure 2**. Lineage markers are describing the used markers for cell type identification as used in this study. Lin = lineage markers e.g. CD14 and CD68.

| Cell type             | Lineage markers           |
|-----------------------|---------------------------|
| T cells               | CD3+                      |
| B cells               | CD20+                     |
| Innate lymphoid cells | CD3-CD7+                  |
| Dendritic cells       | CD11c+CD68-   Lin-HLA-DR+ |
| Monocytes             | CD11c-CD14+CD68-          |
| Immune cells          | CD45+                     |
| Plasma B cells        | CD38+                     |
| Macrophages           | CD68+                     |
| Granulocytes          | CD15+                     |
| Stromal cells         | Vimentin+CD45-            |
| Vessels               | CD31+                     |
| Tumour cells          | Keratin+                  |

**Supplemental table 3. Top 200 most variably expressed genes across sarcoma subtypes.** Known chordoma-related genes are annotated in **bold** (4-6). Genes are ordered following the heatmap presented in **figure 1A**.

**Supplemental table 4. Differentially expressed genes comparing chordomas with other sarcomas.** Contains the results from the differential gene expression analysis with DESeq2. Genes with a log<sub>2</sub> fold change > 2 and an adjusted P < 0.01 were considered significantly differentially expressed. Known immune-related genes are annotated in the column "hgnc\_symbol" with a yellow-filled cell. lfcSE = log fold change standard error; FDR = false discovery rate.

**Supplemental table 5. Univariate cox proportional hazard results in the combined cohort.** Table includes the results of the disease-specific survival in association with all identified T cell phenotypes. Log-rank P values < 0.05 were considered significant. \* < 0.05, \*\* < 0.01, \*\*\* < 0.001. HR = hazard ratio; CI = confidence interval.

| Variable                  | Disease-Specific Survival |            |
|---------------------------|---------------------------|------------|
|                           | Univariate                |            |
|                           | HR (95% CI)               | log-rank P |
| Ki-67+CD4+ T cells        | 0.93 (0.72-1.2)           | 0.6        |
| Ki-67+CD8+ T cells        | 1 (0.9-1.1)               | 0.9        |
| Ki-67+ Regulatory T cells | 0.8 (0.46-1.4)            | 0.4        |
| CD4+ T cells              | 1 (0.99-1)                | 0.5        |
| CD8+ T cells              | 1 (0.98-1.01)             | 0.8        |
| Regulatory T cells        | 0.95 (0.88-1.02)          | 0.2        |

**Supplemental table 6. Univariate and multivariate cox proportional hazard results in the combined cohort.**

Table includes the results of the disease-specific, recurrence-free and metastasis-free survival. Significant parameters from the univariate analysis were taken along for the multivariable analysis. Patients who were only treated with radiotherapy were excluded from the recurrence-free survival analysis. Log-rank *P* values < 0.05 were considered significant and are annotated in bold and by significance level; \* < 0.05, \*\* < 0.01, \*\*\* < 0.001. HR = hazard ratio; CI = confidence interval; RT = radiotherapy.

| Disease-specific survival                  |                          |                   | Metastasis-free survival                   |                 |                   |
|--------------------------------------------|--------------------------|-------------------|--------------------------------------------|-----------------|-------------------|
| Variable                                   | Univariate               |                   | Variable                                   | Univariate      |                   |
|                                            | HR (95% CI)              | log-rank <i>P</i> |                                            | HR (95% CI)     | log-rank <i>P</i> |
| <b>Age at diagnosis</b>                    | 1 (0.98-0.99)            | 0.2               | <b>Age at diagnosis</b>                    | 1 (0.99-1)      | 0.3               |
| <b>Max tumour size</b>                     | 1 (0.91-1.2)             | 0.7               | <b>Max tumour size</b>                     | 1.1 (0.95-1.2)  | 0.3               |
| <b>Location (Skull base)<sup>a</sup></b>   |                          |                   | <b>Location (Skull base)<sup>a</sup></b>   |                 |                   |
| Mobile Spine                               | 0.56 (0.2-1.6)           | 0.09              | Mobile Spine                               | 0.84 (0.21-3.4) | 0.8               |
| Sacrococcygeal                             | 0.35 (0.13-0.92)         |                   | Sacrococcygeal                             | 1.2 (0.4-4)     |                   |
| <b>Treatment (RT alone)</b>                |                          |                   | <b>Treatment (RT alone)</b>                |                 |                   |
| Surgery                                    | 0.87 (0.24-3.1)          | 0.6               | Surgery                                    | 1 (0.23-5.1)    | 1                 |
| Surgery + RT                               | <b>0.57 (0.15-2.2) *</b> |                   | Surgery + RT                               | 0.95 (0.2-4.5)  |                   |
| <b>Timing of RT (Adjuvant)<sup>b</sup></b> |                          |                   | <b>Timing of RT (Adjuvant)<sup>b</sup></b> |                 |                   |
| Neoadjuvant                                | 0.66 (0.076-5.8)         | 0.7               | Neoadjuvant                                | 3.6e-9 (0-Inf)  | 0.2               |
| <b>Surgical margin (R0)<sup>c</sup></b>    |                          |                   | <b>Surgical margin (R0)</b>                |                 |                   |
| R1                                         | 2.1 (0.23-19)            | 0.3               | R1                                         | 2.6 (0.29-23)   | 0.4               |
| R2                                         | 2.3 (0.75-6.8)           |                   | R2                                         | 0.68 (0.25-1.9) |                   |
| <b>T cell infiltration (High)</b>          |                          |                   | <b>T cell infiltration (High)</b>          |                 |                   |
| Low                                        | 2 (0.78-5.3)             | 0.1               | Low                                        | 1.5 (0.52-4)    | 0.5               |
| <b>Disease recurrence (No)<sup>c</sup></b> |                          |                   | <b>Disease recurrence (No)<sup>c</sup></b> |                 |                   |
| Yes                                        | 2 (0.78-5.3)             | 0.9               | Yes                                        | 6.3 (0.83-48)   | <b>0.04 *</b>     |

| Variable                                   | Univariate             |                   | Multivariate         |                   |
|--------------------------------------------|------------------------|-------------------|----------------------|-------------------|
|                                            | HR (95% CI)            | log-rank <i>P</i> | HR (95% CI)          | log-rank <i>P</i> |
| <b>Age at diagnosis</b>                    | 1 (0.98-1.02)          | 0.8               |                      |                   |
| <b>Max tumour size</b>                     | 0.99 (0.9-1.1)         | 0.9               |                      |                   |
| <b>Location (Skull base)<sup>a</sup></b>   |                        |                   |                      |                   |
| Mobile Spine                               | 1.95 (0.94-4.02)       | <b>0.003 **</b>   | <b>2.2 (1-4.5) *</b> | <b>0.01 *</b>     |
| Sacrococcygeal                             | 0.57 (0.26-1.2)        |                   | 0.81 (0.32-2.1)      |                   |
| <b>Treatment (Surgery alone)</b>           |                        |                   |                      |                   |
| Surgery + RT                               | 0.82 (0.45-1.5)        | 0.5               |                      |                   |
| <b>Timing of RT (Adjuvant)<sup>b</sup></b> |                        |                   |                      |                   |
| Neoadjuvant                                | 0.29 (0.066-1.3)       | 0.08              |                      |                   |
| <b>Surgical margin (R0)</b>                |                        |                   |                      |                   |
| R1                                         | 1.6 (0.34-7.4)         | 0.07              | 1.2 (0.24-5.6)       |                   |
| R2                                         | <b>2.3 (1.1-4.8) *</b> |                   | 1.7 (0.7-4.2)        |                   |
| <b>T cell infiltration (High)</b>          |                        |                   |                      |                   |
| Low                                        | 1.1 (0.6-2.1)          | 0.7               |                      |                   |

<sup>a</sup>excluding the only patient with an extra-axial chordoma; <sup>b</sup>excluding patients who received a sandwich regimen of radiotherapy or radiotherapy alone; <sup>c</sup>excluding patients who were only treated with radiotherapy

**Supplemental references**

1. Bertucci F, Finetti P, Simeone I, Hendrickx W, Wang E, Marincola FM, et al. The immunologic constant of rejection classification refines the prognostic value of conventional prognostic signatures in breast cancer. *Br J Cancer*. 2018;119(11):1383-91.
2. Ijsselsteijn ME, van der Breggen R, Sarasqueta AF, Koning F, de Miranda NFCC. A 40-Marker Panel for High Dimensional Characterization of Cancer Immune Microenvironments by Imaging Mass Cytometry. *Front Immunol*. 2019;10.
3. Somarakis A, Van Unen V, Koning F, Lelieveldt B, Holtt T. ImaCytE: Visual Exploration of Cellular Micro-Environments for Imaging Mass Cytometry Data. *IEEE Trans Vis Comput Graph*. 2021;27(1):98-110.
4. Nelson AC, Pillay N, Henderson S, Presneau N, Tirabosco R, Halai D, et al. An integrated functional genomics approach identifies the regulatory network directed by brachyury (T) in chordoma. *J Pathol*. 2012;228(3):274-85.
5. Duan W, Zhang B, Li X, Chen W, Jia S, Xin Z, et al. Single-cell transcriptome profiling reveals intra-tumoral heterogeneity in human chordomas. *Cancer Immunol Immunother*. 2022;71(9):2185-95.
6. Zhang Q, Fei L, Han R, Huang R, Wang Y, Chen H, et al. Single-cell transcriptome reveals cellular hierarchies and guides p-EMT-targeted trial in skull base chordoma. *Cell Discov*. 2022;8(1):94.

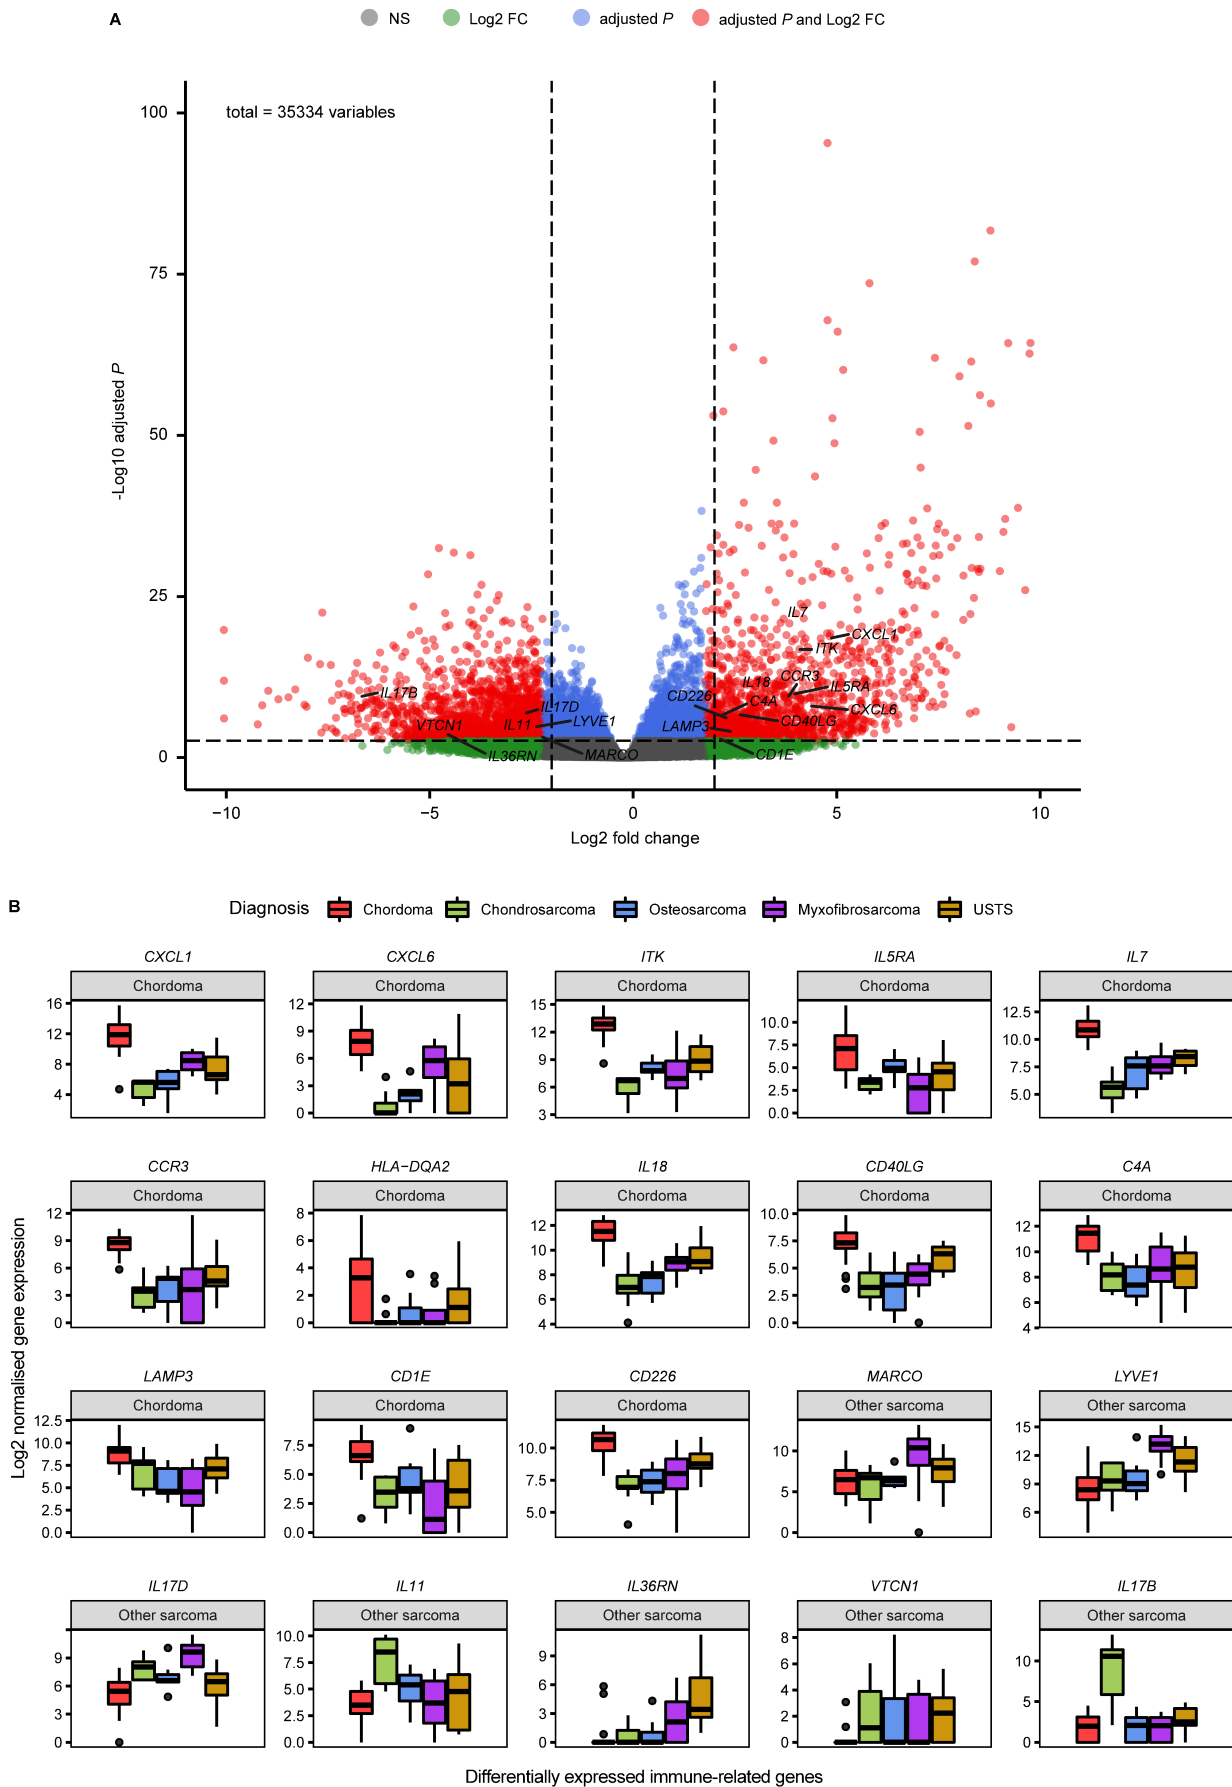

**Supplemental figure 1 | Chordomas are enriched for immune-related gene signaling. (A)** Enhanced volcano plot presenting the differential gene expression analysis between chordomas ( $n = 20$ ) and all other studied sarcomas ( $n = 39$ ). Genes with a  $\log_2$  fold change above 2 and an adjusted  $P$  value below 0.01 were considered significantly differentially expressed. Immune-related genes were labelled for visualisation. **(B)** Boxplots displaying the  $\log_2$  normalised expression of the differentially expressed immune related genes. The boxplots are ordered in descending order for the  $\log_2$  fold change and annotated for the respective group in which they are significantly enriched (chordoma vs other sarcoma). The boxplots are coloured for their respective histotype. NS = not significant; FC = fold change; USTS = undifferentiated soft tissue sarcoma.

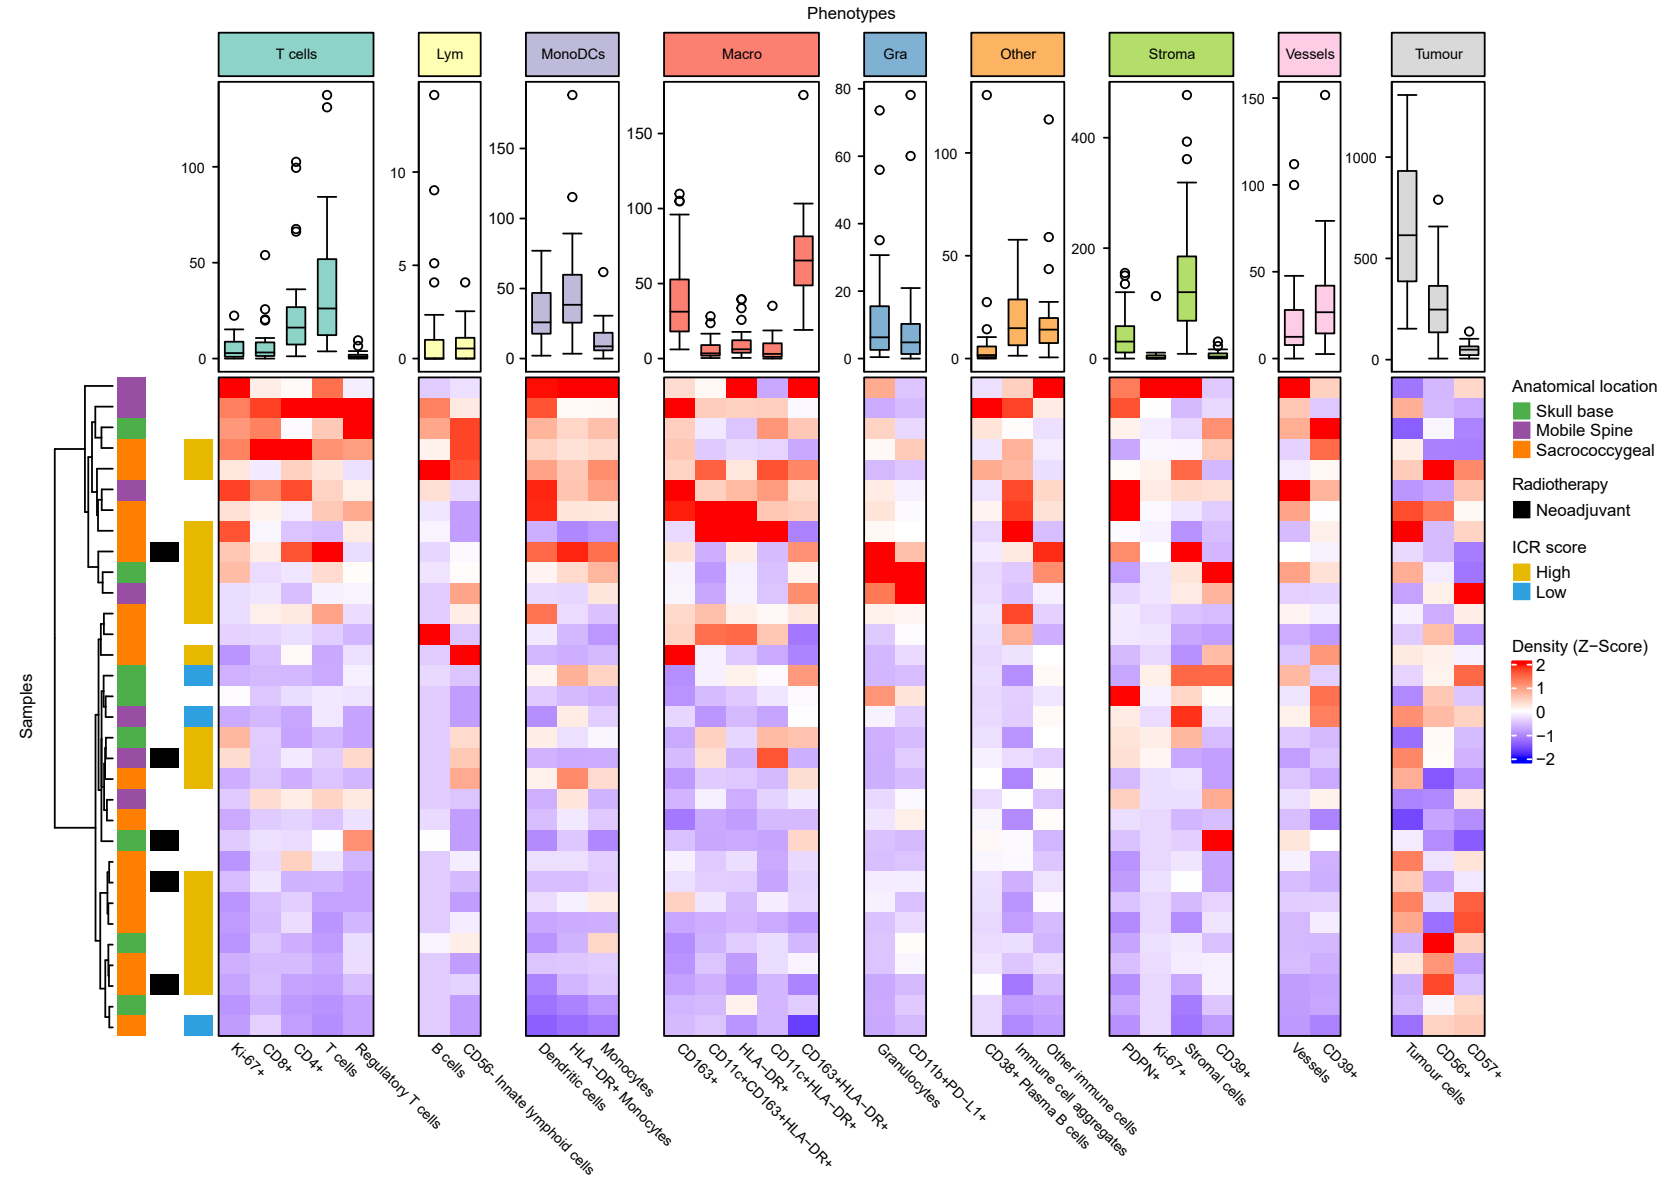

**Supplemental figure 2 | Overview of the chordoma microenvironment.** Overview heatmap of the mean cell density Z-Score of 29 identified cell phenotypes in all chordoma samples ( $n = 32$ ). The samples that were used for transcriptome sequencing are annotated according to their ICR score. Samples are hierarchically clustered and annotated for their anatomical location and whether they had received neoadjuvant radiotherapy. Boxplots are presented per phenotype to display the general mean cell densities per  $\text{mm}^2$  for each phenotype. ICR = immunologic constant of rejection; Lym = lymphoid; MonoDCs = monocytes and dendritic cells; Macro = macrophages; Gra = granulocytes; PDPN = podoplanin.



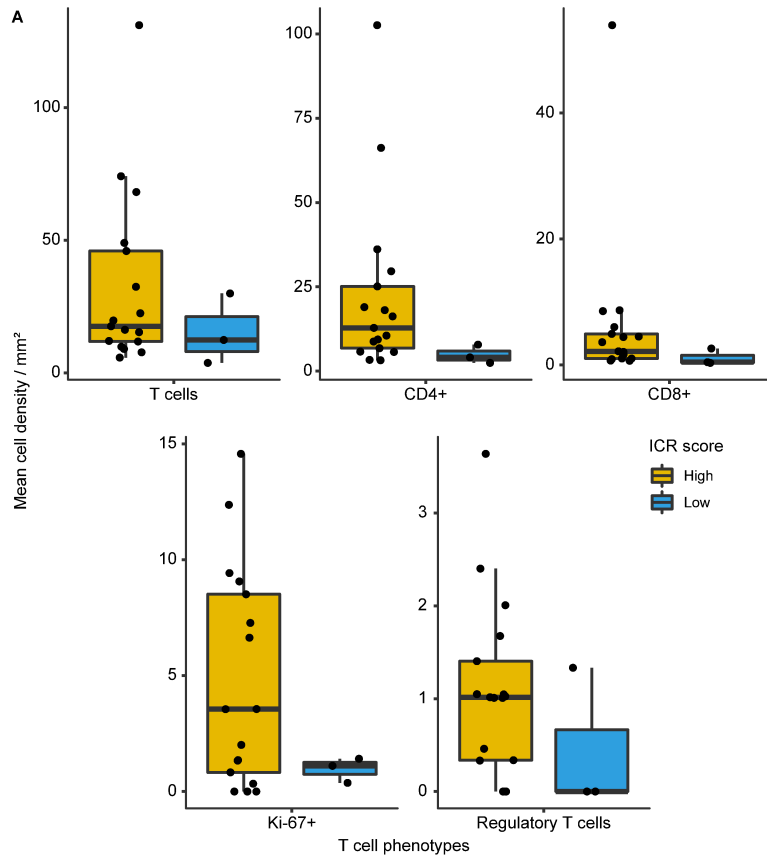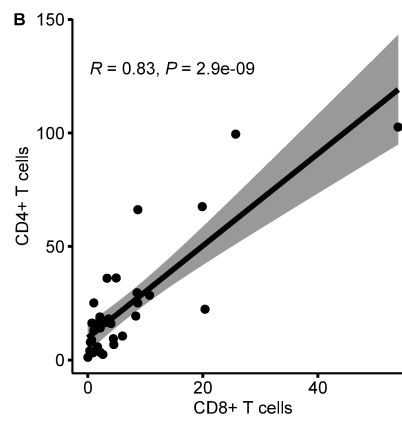

**Supplemental figure 3 | ICR high chordomas are enriched with T cell phenotypes. (A)** Boxplots representing the different levels of infiltration of the identified T cell populations between ICR-high ( $n = 17$ ) and ICR-low ( $n = 3$ ) chordomas. No statistical tests were performed due to the small sample size. ICR = immunologic constant of rejection. **(B)** Correlation plot presenting the Pearson correlation between CD4+ T cell and CD8+ T cell infiltration based on the imaging mass cytometry data.

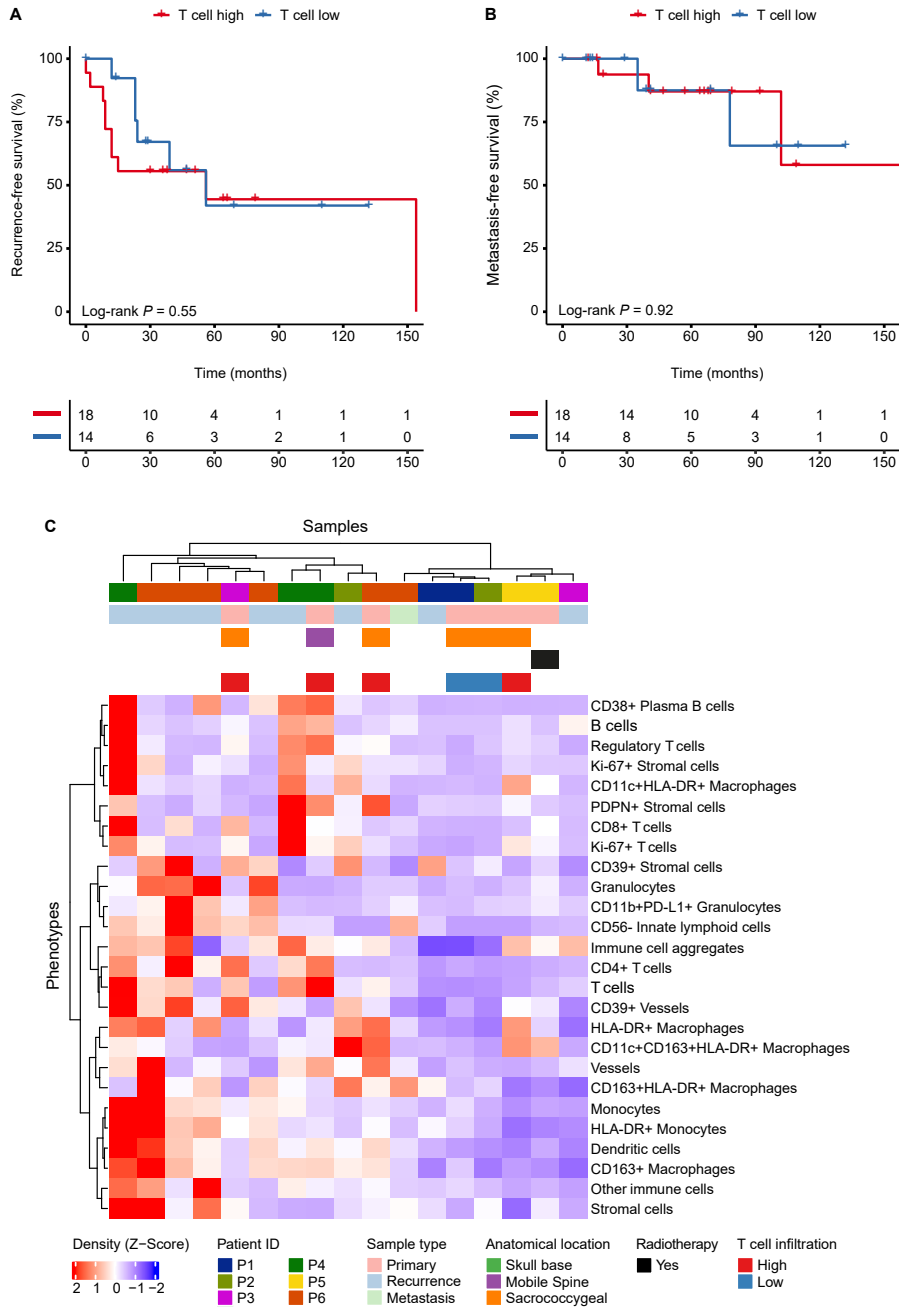

**Supplemental figure 4 | The immune contexture of chordomas varies over time. (A, B)** Kaplan-Meier curve indicating the association between T cell infiltration and recurrence-free survival **(A)** as well as metastasis-free survival **(B)**. Two-sided log-rank tests were performed for the Kaplan Meier estimates. **(C)** Heatmap presenting the unsupervised clustering of untreated primary tumours ( $n = 6$ ) and their respective treated primary tumour ( $n = 1$ ), recurrences ( $n = 9$ ) and metastases ( $n = 1$ ). The heatmap displays the mean cell density Z-Score of the identified cell phenotypes, excluding tumour cells. The samples are annotated for patient ID, type of sample, anatomical location, whether the tumour was treated with neoadjuvant radiotherapy and T cell group of the primary tumour. PDPN = podoplanin.

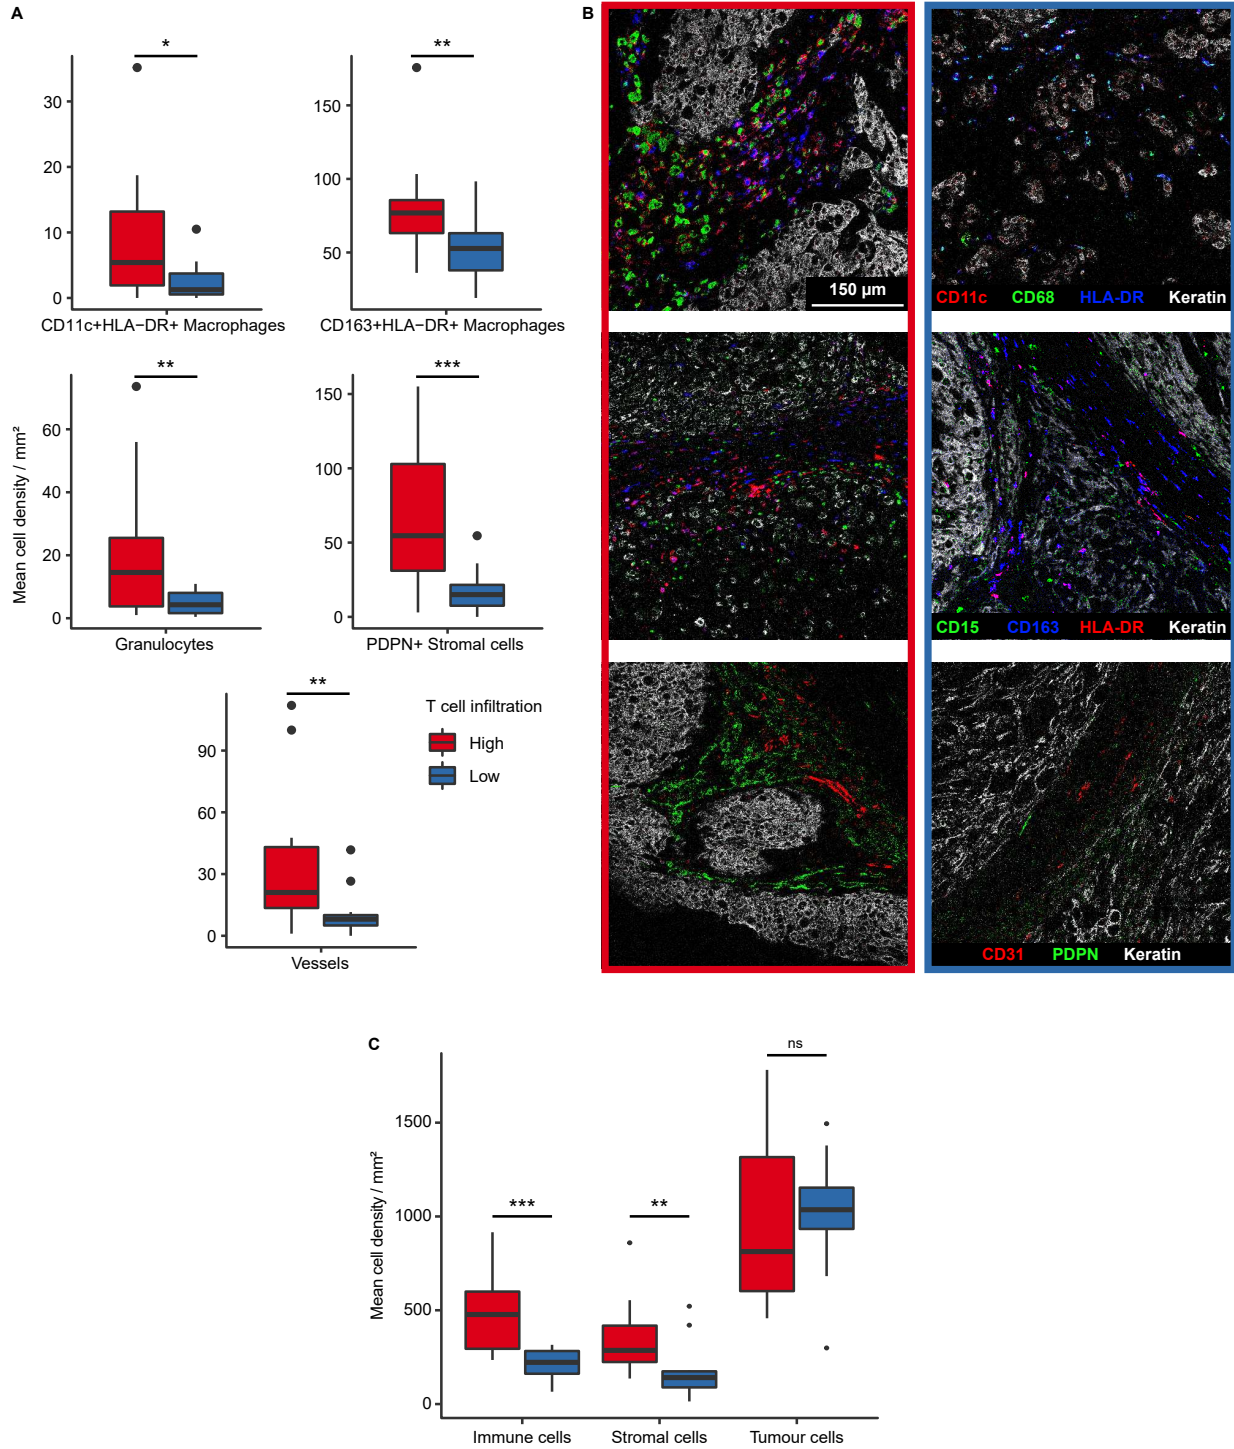

**Supplemental figure 5 | Comparative overview of the chordoma immune microenvironment. (A)**

Boxplots with the significantly different phenotypes between the T cell high and T cell low groups. Two-sided t-test was performed in R and the  $P$  value was adjusted with the Benjamini-Hochberg false discovery rate (FDR). All presented phenotypes were significantly different between the T cell high and T cell low group. \* =  $P < 0.05$ ; \*\* =  $P < 0.01$ ; \*\*\* =  $P < 0.001$ . **(B)** Representative images generated with imaging mass cytometry displaying the differentially abundant cell phenotypes in both T cell low and T cell high samples. Images are grouped per row for the displayed cell markers and outlined with their respective T cell group (T cell high = red rectangle & left, T cell low = blue rectangle & right). The top row presents CD11c<sup>+</sup> macrophages (CD11c = red, CD68 = green, HLA-DR = blue, keratin = white), the middle row displays granulocytes and CD163<sup>+</sup>HLA-DR<sup>+</sup> macrophages (CD15 = green, CD163 = blue, HLA-DR = red, keratin = white) and the bottom row shows vessels and podoplanin<sup>+</sup> stromal cells (CD31 = red, PDPN = green, keratin = white). **(C)** Boxplots presenting the cumulative mean cell density per mm<sup>2</sup> of all immune cells, stromal cells and tumour cells in both T cell high and T cell low groups. Two-sided t-test was performed in R. \*\* =  $P < 0.01$ , \*\*\* =  $P < 0.001$ . PDPN = podoplanin.

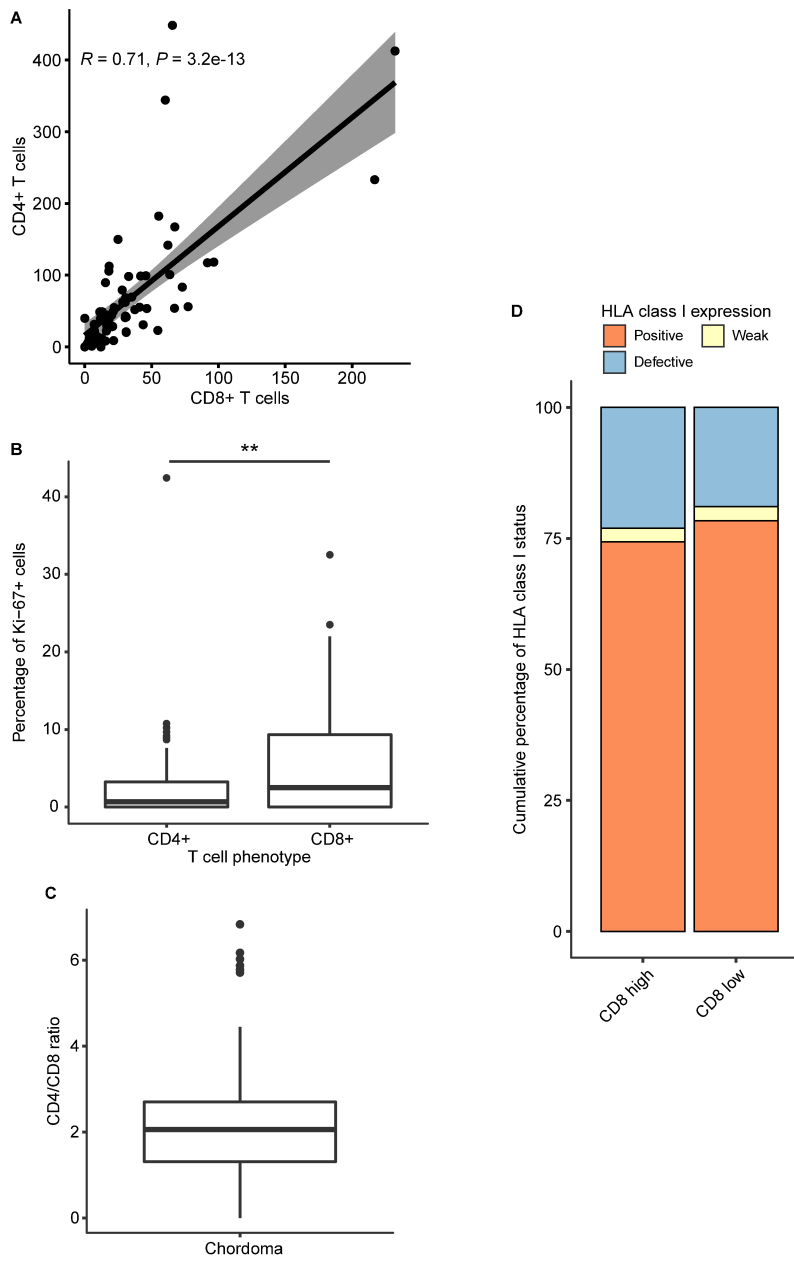

**Supplemental figure 6 | CD4+ T cell infiltration and HLA class I expression in association with CD8+ T cell infiltration. (A)** Correlation plot presenting the Pearson correlation between CD4+ T cell and CD8+ T cell infiltration based on the immunofluorescence data. **(B)** Boxplots displaying the percentage of Ki-67+ cells for CD4+ and CD8+ T cells. A two-sided t-test was performed to compare Ki-67+CD4+ T cells with Ki-67+CD8+ T cells. \*\* =  $P < 0.01$ . **(C)** Boxplot presenting the CD4/CD8 ratio in chordomas **(D)** Stacked bar plots displaying the percentual distribution of the observed HLA class I (both HCA2 and HC10) expression patterns in the chordoma samples divided into CD8+ T cell high and low with the median cell density as cut-off. (CD8+ high:  $n = 37$ ; CD8+ low:  $n = 37$ ).



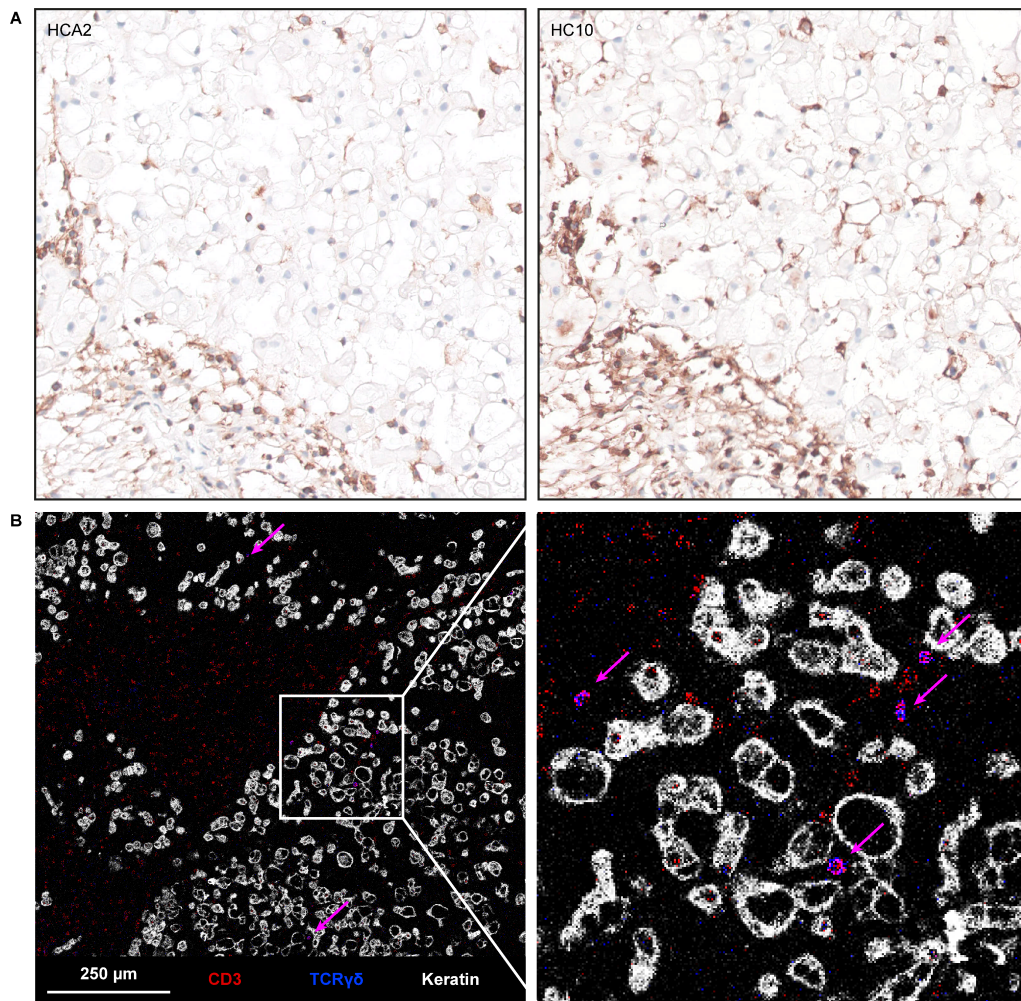

**Supplemental figure 7 |  $\gamma\delta$  T cell infiltration in relation to HLA class I expression.** (A) Examples images of Human Leukocyte Antigen (HLA) class I (HCA2 and HC10) expression in a T cell high chordoma as validated by immunohistochemistry. (B) An example image and a corresponding magnification of the same tissue core as displayed in (A) as generated by imaging mass cytometry. The images present intratumoral  $\gamma\delta$  T cell infiltration as indicated by the magenta arrows (CD3 = red, TCR $\gamma\delta$  = blue, keratin = white). TCR = T cell receptor.
